# Supplementary material for: Lymphocyte Exhaustion in AML Patients and Impacts of HMA/Venetoclax or Intensive Chemotherapy on Their Biology
Source: MDPI journal article supplement (doi:10.3390/cancers14143352), 2022-07-10
Supplement: s1 [file s1]

# Supplementary Material: Lymphocyte Exhaustion in AML Patients and Impacts of HMA/Venetoclax or Intensive Chemotherapy on Their Biology

Dmitry Zhigarev, Asya Varshavsky, Alexander W. MacFarlane IV, Prathiba Jayaguru, Laura Barreyro, Marina Khoreva, Essel Dulaimi, Reza Nejati, Christina Drenberg and Kerry S. Campbell

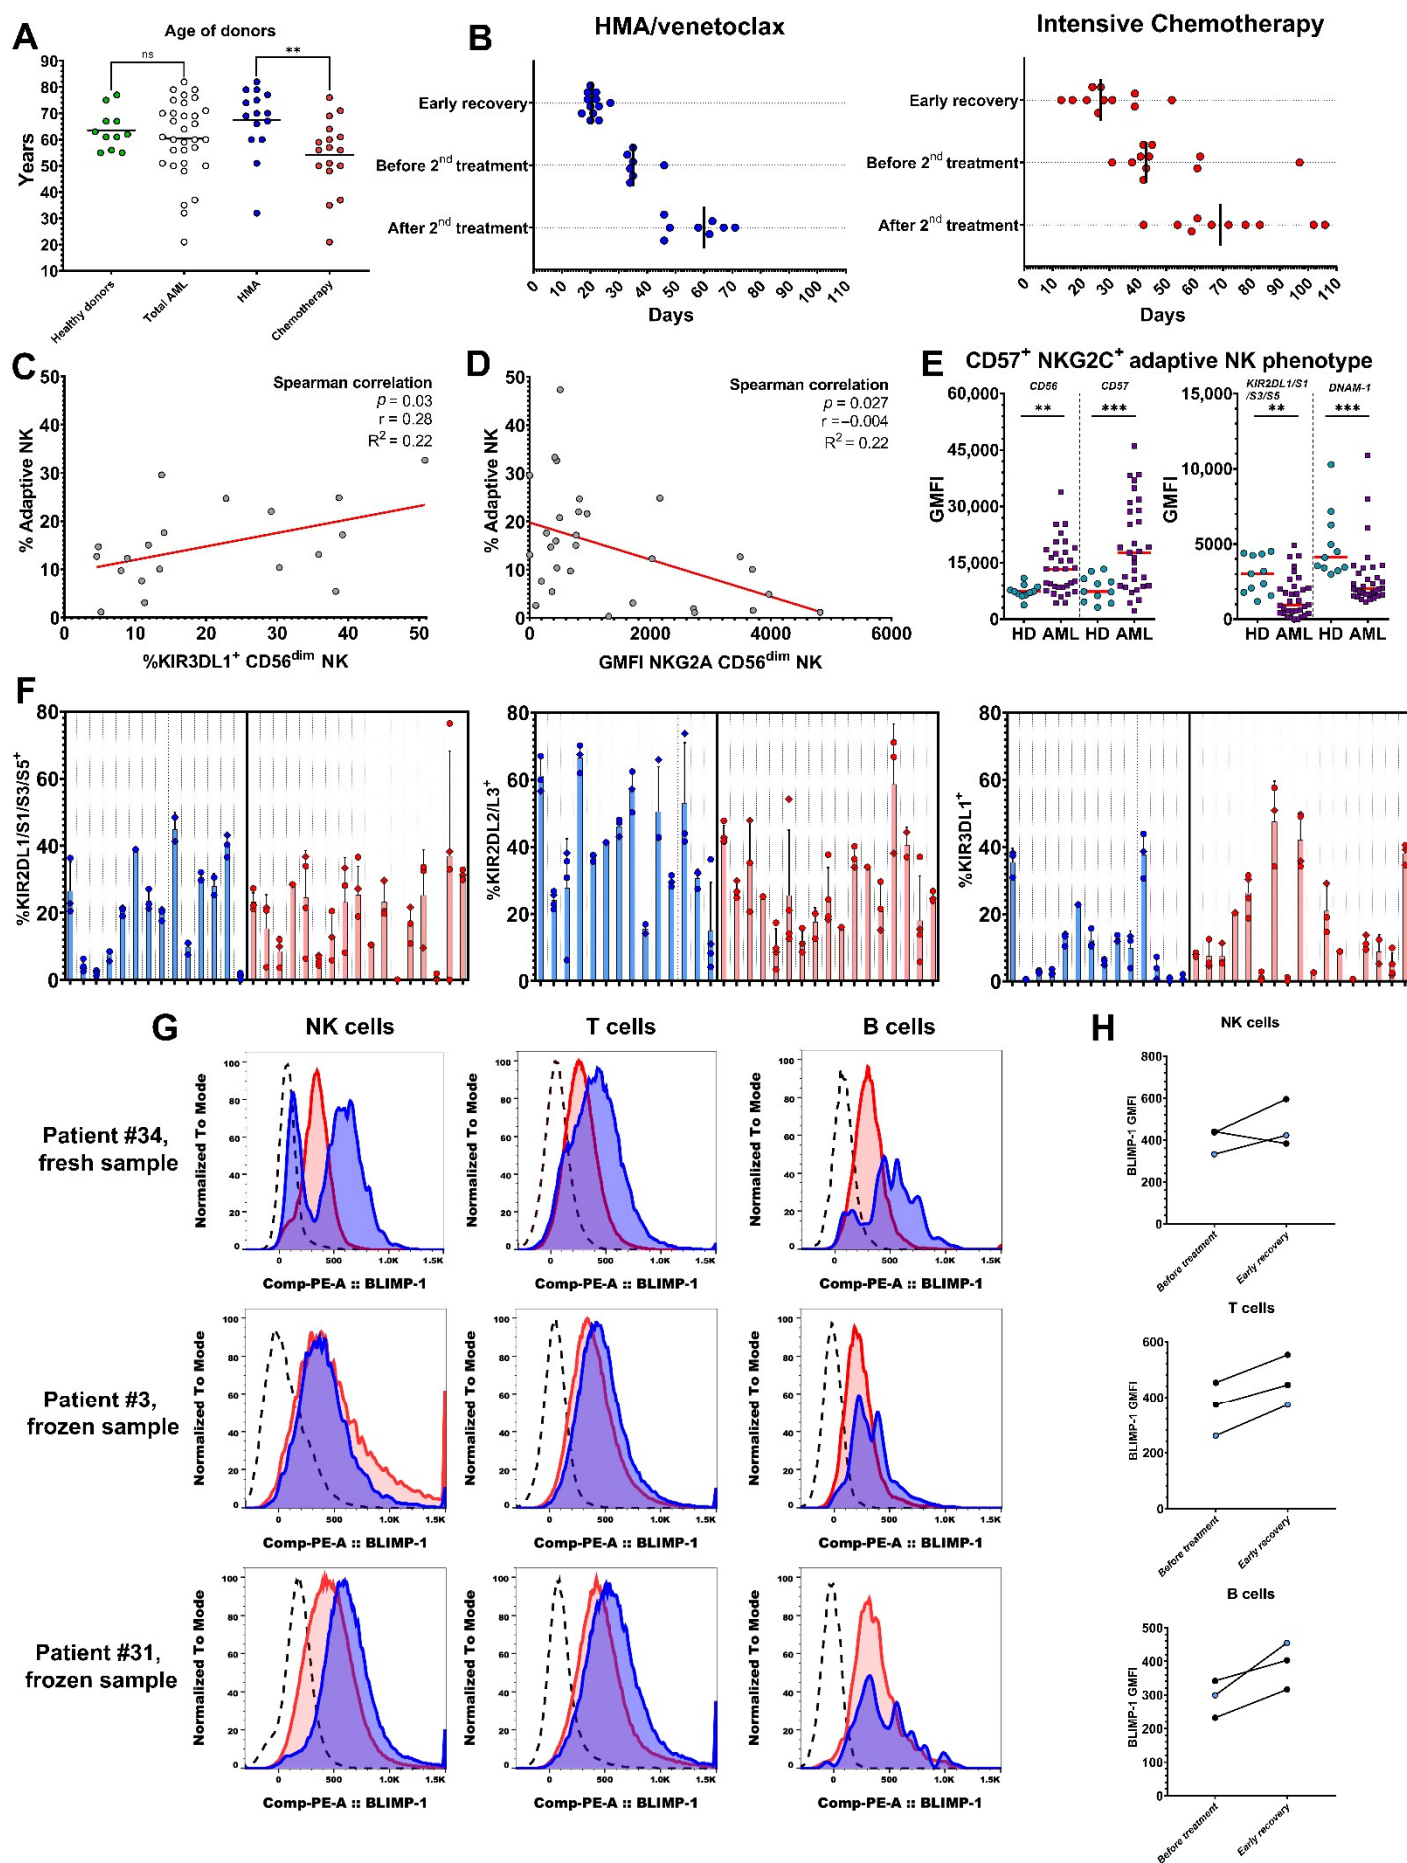

**Figure S1.** Additional characteristics of AML patients. **(A)** Age of individual donors. Green circles show the HD cohort and open circles are total AML patient cohort. Black lines represent means. **(B)** The timing of blood sampling for AML patients. Blue circles display HMA/venetoclax and red circles show IC treated AML patients. Black lines mark medians. **(C)** Positive Spearman correlation of % adaptive NK cells and % KIR3DL1<sup>+</sup> total mature NK cells from untreated AML patients. **(D)** Negative Spearman correlation of % adaptive NK cells and % NKG2A<sup>+</sup> mature NK cells from untreated AML patients. **(E)** GMFI expression levels of CD56, CD57, KIR2DL1/S1/S3/S5 and DNAM-1 on adaptive NK cells in HD and patients. Red lines mark medians **(F)** Changes in % CD56<sup>dim</sup> NK cells expressing KIR2DL1/S1/S3/S5, KIR2DL2/L3, or KIR3DL1 during HMA/venetoclax (blue columns) and IC (pink columns). Each column shows mean values and SD for a particular patient with each circle a measure at one of the three post-treatment time points, and pretreatment samples marked as diamonds. **(G)** Blimp-1 expression on lymphocytes from three AML patients before and after initial HMA treatment. Black dashed lines are isotype control, shaded lines represent intensity of BLIMP-1 staining before (red) and after (blue) HMA treatment. **(H)** Blimp-1 expression changes on NK, T, and B cells from three AML patients before and after initial HMA treatment. Black dots represent samples, previously frozen in FBS with 10% DMSO and stored in liquid nitrogen. In **(A)** and **(E)**: Mann-Whitney nonparametric U test was used for statistical analysis. ns— $p > 0.05$ ; \*\*— $p < 0.01$ ; \*\*\*— $p < 0.001$ . In **(C)** and **(D)**: Spearman's rank correlation coefficient ( $r$ ), and coefficient of determination ( $R^2$ ) are displayed in correlation plots. A red line is a linear regression line to better visualize the correlation.

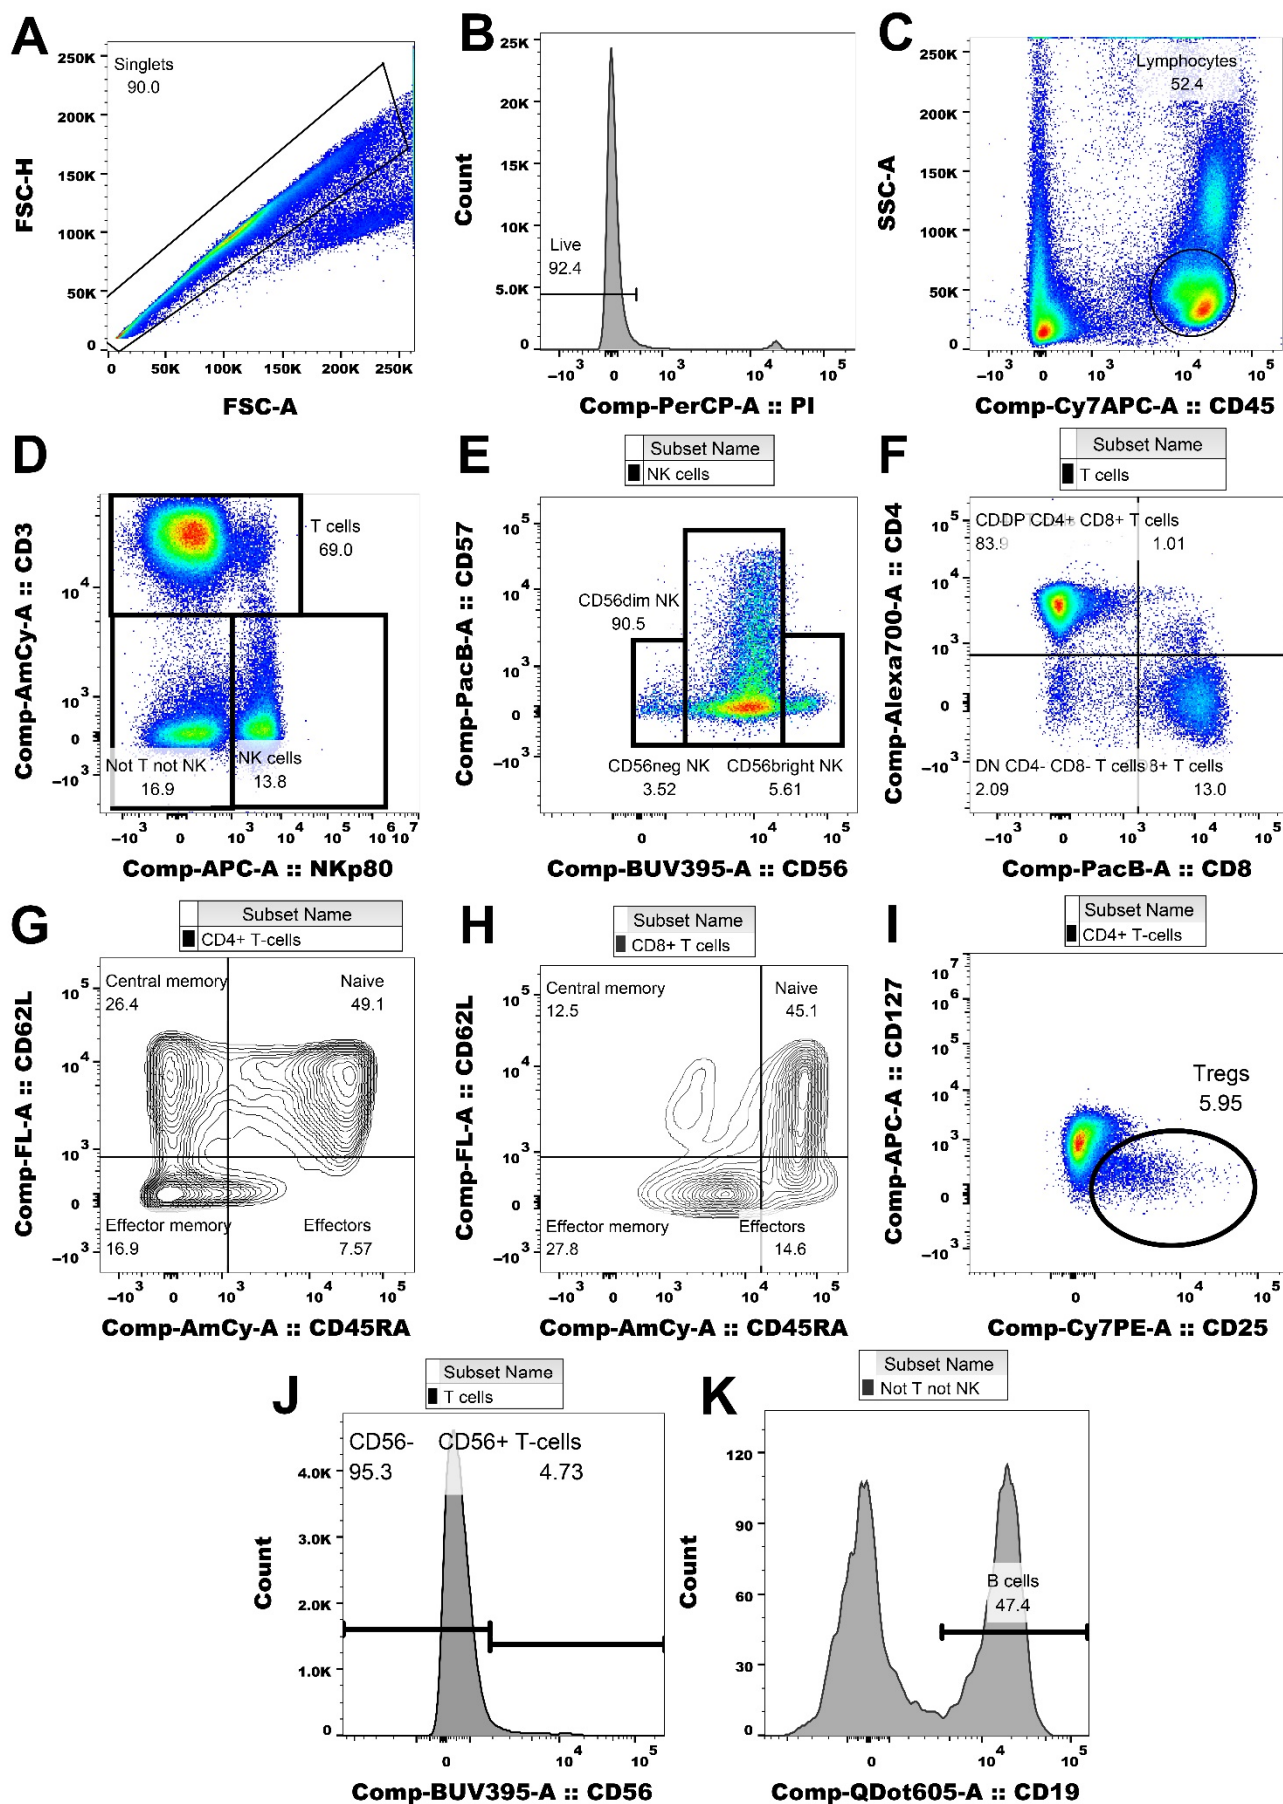

**Figure S2.** General scheme of the gating strategy used in the study. (A) Single cells were selected in a forward scatter area (FSC-A) vs forward scatter height (FSC-H) plot. (B) Then, living cells were selected as propidium iodide (PI)-negative or Ghost Red 710-negative (for subsequently fixed and permeabilized samples; Tonbo Bioscience). (C) Lymphocytes were identified as CD45<sup>+</sup>SSC<sup>low</sup> cells in a CD45 vs side scatter area (SSC-A) dot plot. (D) NK cells were defined as CD3<sup>+</sup>NKp80<sup>+</sup> lymphocytes (or as CD3<sup>+</sup>CD56<sup>+</sup> lymphocytes in tubes with no NKp80 antibodies). T cells were defined as CD3<sup>+</sup> lymphocytes. The population of CD3<sup>+</sup> NKp80<sup>+</sup> lymphocytes was defined as “not T not NK cells”. (E) Total NK cell population then was divided into CD56<sup>dim</sup>, CD56<sup>bright</sup>, and CD56<sup>neg</sup> cells in a CD56 vs. CD57 plot. (F) CD4<sup>+</sup>, CD8<sup>+</sup>, double-positive and double-negative T cells were separated in CD8 vs. CD4 plot. (G) CD4<sup>+</sup> and (H) CD8<sup>+</sup> T cells were plotted in CD45RA vs. CD62L coordinates and subpopulations of naïve (CD45RA<sup>+</sup> CD62L<sup>+</sup>), central memory (CD45RA<sup>+</sup> CD62L<sup>+</sup>), effector memory (CD45RA<sup>+</sup> CD62L<sup>+</sup>) and effector (CD45RA<sup>+</sup> CD62L<sup>+</sup>) T cells were selected. (I) Additionally, Tregs were defined as CD25<sup>high</sup> CD127<sup>+</sup> CD4<sup>+</sup> T cells, and (J) CD56<sup>+</sup> T cells were selected. (K) “Not T not NK cell” population was used for gating B cells as CD19<sup>+</sup>.

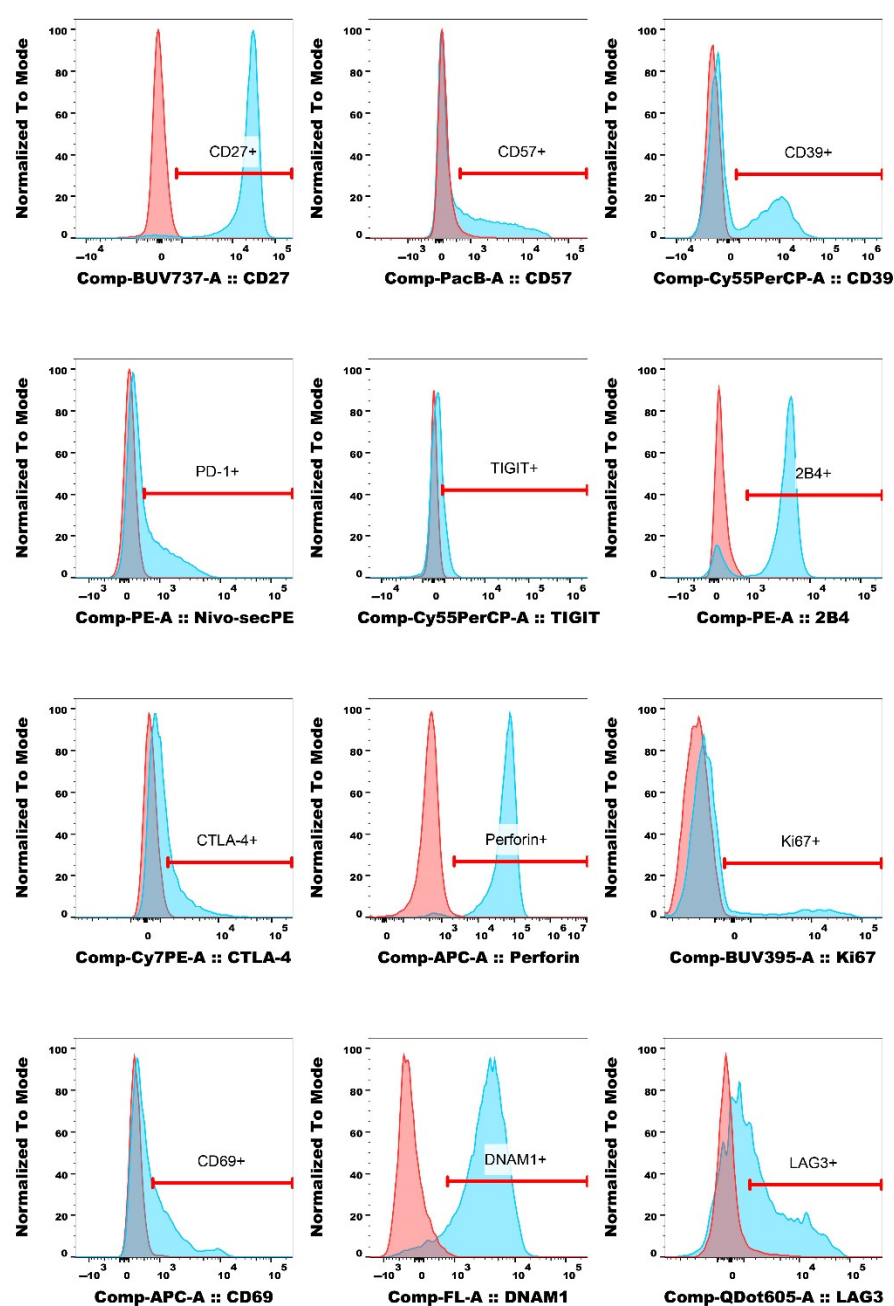



**Figure S3.** Representative staining of various biomarkers. CD27 (gated on total T cells), CD57 (gated on CD56<sup>dim</sup> NK cells), CD39 (gated on B cells), PD-1 (gated on CD4<sup>+</sup> T cells), TIGIT (gated on CD8<sup>+</sup> central memory T cells), 2B4 (gated on CD8<sup>+</sup> effector T cells), CTLA-4 (gated on Tregs), Perforin (gated on CD56<sup>dim</sup> NK cells), Ki67 (gated on Tregs), CD69 (gated on CD8<sup>+</sup> T cells), DNAM-1 (gated on CD56<sup>dim</sup> NK cells), and LAG-3 (gated on CD56<sup>+</sup> T cells) were stained with antibodies described in Supplementary Table S2. Red histograms represent IgG controls or non-expressing population staining. Blue histograms show actual staining from a healthy donor who participated in the study. Gates for % positive cells were set where <1% of cells were gated in control histograms.

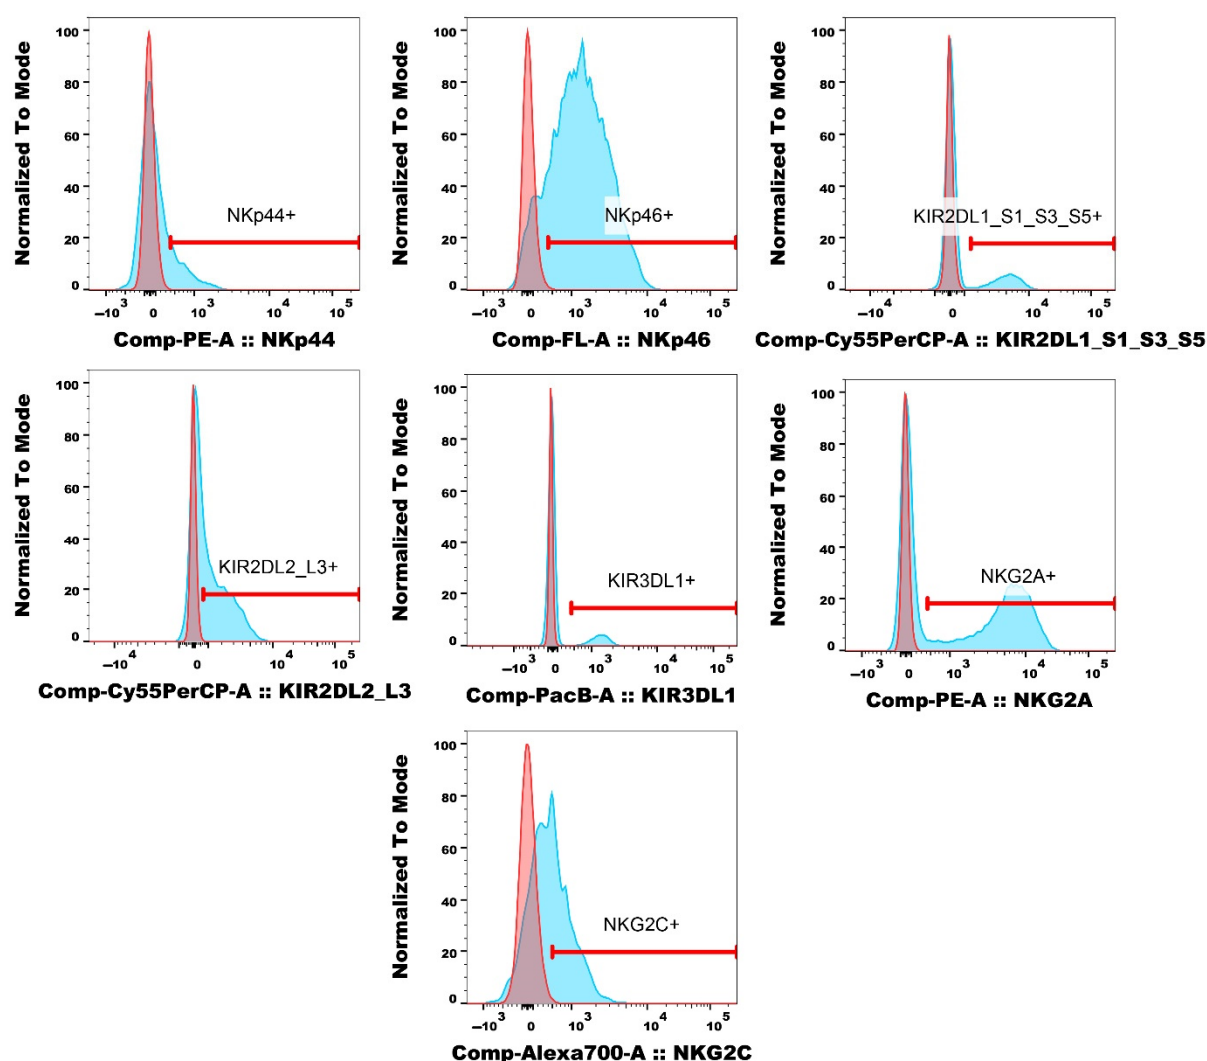

**Figure S4.** Representative staining of various biomarkers on NK cells. NKp44, NKp46, KIR2DL1/S1/S3/S5, KIR2DL2/L3, KIR3DL1, NKG2A, and NKG2C were stained with antibodies described in Supplementary Table S2. Red histograms represent IgG controls or non-expressing population staining. Blue histograms show actual staining from a healthy donor who participated in the study. Gates for % positive cells were set where <1% of cells were gated in control histograms.

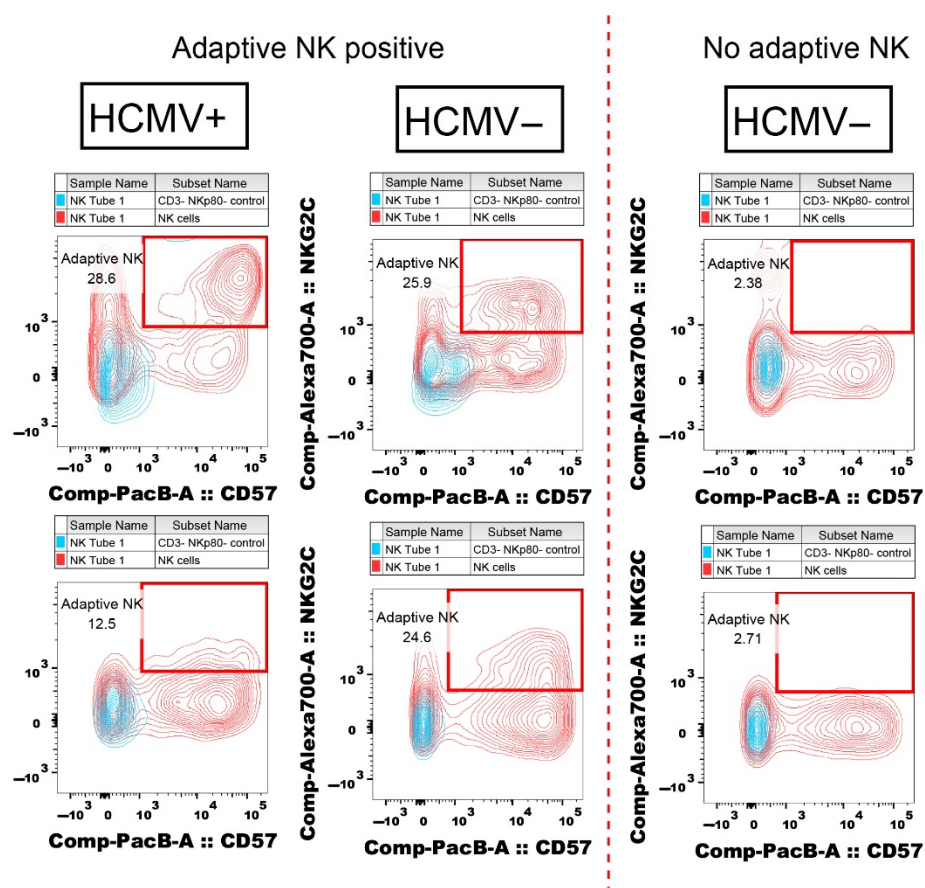

**Figure S5.** Representative staining of adaptive NK cells. NK cells were gated as CD3-NKp80<sup>+</sup>, as in Figures 2A and S2D, and contour 2D plots are shown for staining of NKG2C vs. CD57 to delineate adaptive NK cells as NKG2C<sup>+</sup> CD57<sup>+</sup> (red boxes) in peripheral blood of six representative untreated AML patients. Superimposed plots are shown for staining of these markers on the NK cells (red), as compared to non-T/non-NK cells (CD3- NKp80<sup>+</sup>; blue), as a control. Percentages of NKG2C<sup>+</sup> CD57<sup>+</sup> adaptive NK cells (within the red boxes) of the total NK cells are indicated. Each column shows two examples of HCMV<sup>+</sup> or HCMV<sup>–</sup> patients shown to possess (left of dotted line) or lack (right of dotted line) adaptive NK cells. Top panels of patients with adaptive NK cells show bimodal staining for NKG2C, whereas bottom panels show more diffuse NKG2C staining that is clearly above staining of the control cells.

Table S1. Patient characteristics.

| Patient No. | Age at Diagnosis | Gender | Cytogenetics and Mutations                                                                                                                                       | Treatment                             | Outcomes                         | ELN 2017 Risk | Samples Collected |
|-------------|------------------|--------|------------------------------------------------------------------------------------------------------------------------------------------------------------------|---------------------------------------|----------------------------------|---------------|-------------------|
| 1           | 56               | Male   | 45XY, -7[4],46, XY[17]. Mut: EZH1, RUNX1                                                                                                                         | Vyxeos                                | CR                               | poor          | 4                 |
| 2           | 77               | Male   | 46XY Mut: FLT3-ITD high                                                                                                                                          | Decitabine/venetoclax                 | CRi                              | poor          | 4                 |
| 3           | 75               | Male   | 45,X,-Y[2]/45,sl,add(6)(p22)[4]/46,sdl,+r[14] Mut: NRAS, TET2, ZRSR2                                                                                             | Decitabine/venetoclax                 | NR                               | intermediate  | 4                 |
| 4           | 56               | Female | 46XX, del5q Mut: DNMT3A, FLT3-TKD                                                                                                                                | 7+3/Midostaurin, FLAG-ida             | NR to induction, CRi reinduction | poor          | 4                 |
| 5           | 64               | Male   | 46,XY,inv(16)(p13.1q22)[15]/47,sl,+22[1]/49,sdl,9,+13[2]/46,sl,r(7)(p22q36)[3]46.XY[1] Mut: FLT3-ITD low                                                         | 7+3/Midostaurin                       | CR                               | favorable     | 4                 |
| 6           | 76               | Male   | 46XY, -21q22, Mut: FLT3-ITD low                                                                                                                                  | 7+3                                   | NR                               | intermediate  | 1                 |
| 7           | 79               | Female | 46XX, del12p Mut: FLT3-ITD low, SRSF2, TET2                                                                                                                      | Decitabine/venetoclax                 | CR                               | intermediate  | 4                 |
| 8           | 48               | Female | 46XX, Mut: NPM1, IDH2, DNMT3A, NRAS                                                                                                                              | 7+3, HiDAC                            | CR                               | favorable     | 4                 |
| 9           | 69               | Female | 46XX, Mut: NPM1, FLT3-ITD low, TET2                                                                                                                              | 7+3/Midostaurin                       | CR                               | favorable     | 4                 |
| 10          | 51               | Female | 46XX, t(8,21)                                                                                                                                                    | 7+3/HiDAC                             | CR                               | favorable     | 4                 |
| 11          | 32               | Female | 46XX, Mut: CEBPA, NRAS, WT1                                                                                                                                      | 5-azacytidine/venetoclax              | CR                               | favorable     | 3                 |
| 12          | 50               | Female | 46XX, Mut: FLT3-ITD high                                                                                                                                         | 7+3+ midostaurine, HiDAC+midostaurine | CR                               | poor          | 4                 |
| 13          | 61               | Female | 46XX, Mut: FLT3-ITD low, NPM1, TET2                                                                                                                              | 7+3+ midostaurine/HiDAC+midostaurine  | CR                               | favorable     | 4                 |
| 14          | 60               | Male   | 44XX, -5,-7,del12p, -18, r(1), -x, del(13)+8, add 10p11, add 16q22, add 20q11 Mut: TP53, TET2                                                                    | Decitabine/venetoclax                 | NR                               | poor          | 4                 |
| 15          | 79               | Male   | 46,XY,t(3;21)(q26;q22),del(7)(q22q36),add(19)(p13.1)[20] , Mut: PTPN11                                                                                           | 5-azacytidine/venetoclax              | not assessed                     | poor          | 1                 |
| 16          | 35               | Female | 46XX, inv (16) Mut: NRAS, WT1                                                                                                                                    | 7+3                                   | CR                               | favorable     | 1                 |
| 17          | 60               | Male   | 46XY, Mut: SRSF2.                                                                                                                                                | 7+3, HiDAC                            | CR                               | intermediate  | 4                 |
| 18          | 70               | Female | 50XX, trisomy 8, tetrasomy 11, trisomy 13, del 17p, Mut: TP53, GNAS                                                                                              | Decitabine/venetoclax                 | CR                               | poor          | 3                 |
| 19          | 37               | Male   | 47,XY,+11[20], Mut: IDH1                                                                                                                                         | 7+3, FLAG-ida                         | NR                               | intermediate  | 1                 |
| 20          | 66               | Male   | 40~41,XY,add(3)(q12),der(4;7)(q10;p10),add(5)(q11.2),-6,add(8)(q24.2),-9,-13,-15,der(15;16)(q10;q10),-17,-18,add(22)(q13),+3~4mar[cp11]/46,XY[9] Mut: JAK2, TP53 | 5-azacytidine/venetoclax              | NR                               | poor          | 4                 |
| 21          | 21               | Female | 46XX, Mut: CALR, DNMT3A, IDH1, NF1                                                                                                                               | 7+3, HiDAC                            | NR                               | intermediate  | 3                 |
| 22          | 51               | Male   | 45~47,XY,-2,del(5)(q22q35),der(9)del(9)(p13)add(9)(q34),del(10)(p11.2),-12,-15,-17,+18,del(18)(q21),der(18)t(2;18)(q13;q21),+r,+2mar[20], Mut: TP53              | 5-azacytidine/venetoclax              | NR                               | poor          | 3                 |
| 23          | 57               | Male   | 46XY, KMT2A rearrangement, Mut: ASXL1                                                                                                                            | Vyxeos                                | CR                               | poor          | 3                 |
| 24          | 82               | Male   | 46XY, Mut: IDH1, SRSF2, BCOR, DNMT3A                                                                                                                             | Decitabine/venetoclax                 | NR                               | intermediate  | 3                 |



|    |    |        |                                                                                                              |                          |     |              |   |
|----|----|--------|--------------------------------------------------------------------------------------------------------------|--------------------------|-----|--------------|---|
| 25 | 70 | Female | 42-46,XX,del(5)(q13q33),del(7)(q21.2q36),-13, t(14;21)(q11.2;q22),<br>add(19)(p13.3),+0-1mar[cp18]/46, XX[2] | Decitabine/venetoclax    | CR  | poor         | 4 |
| 26 | 69 | Male   | 45-51,XY,t(3;12)(q27;q13),-5,del(6)(q15q21),del(7)(q21),+1-<br>9mar[cp15]/46,X<br>Y[5] , Mut: TP53           | 5-azacytidine/venetoclax | CR  | poor         | 3 |
| 27 | 59 | Male   | 46XY, Mut: JAK2, WT1, PTPN1                                                                                  | Vyxeos                   | CR  | intermediate | 2 |
| 28 | 67 | Male   | 46XY                                                                                                         | 5-azacytidine/venetoclax | CR  | intermediate | 3 |
| 29 | 60 | Male   | 46XY, Mut: TP53, SRSF2, TET2                                                                                 | Decitabine/venetoclax    | CR  | poor         | 4 |
| 30 | 50 | Female | 45,XX,-20[3]/46,XX[11, Mut: FLT3 ITD low                                                                     | 7+3/Midostaurin          | CR  | intermediate | 4 |
| 31 | 71 | Female | 46XX, Mut: TET2, CTNNA1,NPM1, ATM                                                                            | Vyxeos                   | CRi | favorable    | 3 |
| 32 | 74 | Male   | 46XY, Mut: TET2, KAT6A, IDH2, ASXL1, U2AF1                                                                   | Decitabine/venetoclax    | CRi | poor         | 1 |

CR: complete remission; Cri: complete remission with incomplete count recovery; ELN: European LeukemiaNet; FLAG: a combination of Fludarabine, Cytarabine, Idarubicin and G-CSF; HiDAC: high-dose cytarabine; ida: idarubicin; Mut: mutations; NR: non-responders, 7+3: a course of 7 days of standard-dose cytarabine, and 3 days of an anthracycline antibiotic.

Table S2. Antibody panel.

| Tube              | Marker                        | Fluorophore/Channel | Clone            | Manufacturer                   |
|-------------------|-------------------------------|---------------------|------------------|--------------------------------|
| T and B cells 1   | CD62L                         | FITC                | DREG-56          | Biolegend                      |
|                   | PD-1<br>(Nivolumab/anti-IgG4) | PE                  | Nivolumab/HP6025 | FCCC Pharmacy/Southern Biotech |
|                   | CD69                          | APC                 | FN50             | Biolegend                      |
|                   | CD39                          | PerCP/Cy5.5         | TU66             | BD                             |
|                   | CD4                           | AF 700              | OKT4             | Biolegend                      |
|                   | CD8                           | Pacific Blue        | HIT8a            | Biolegend                      |
|                   | CD3                           | Cy7/PE              | UCHT1            | Biolegend                      |
|                   | CD56                          | BUV395              | NCAM16.2         | BD                             |
|                   | CD45                          | APC-H7              | 2D1              | BD                             |
|                   | PI                            | PerCP               | N/A              | N/A                            |
|                   | CD19                          | QDOT605             | HIB19            | Biolegend                      |
|                   | CD45RA                        | BV510               | HI100            | BD                             |
| T and B cells 2   | CD62L                         | FITC                | DREG-56          | Biolegend                      |
|                   | 2B4                           | PE                  | C1.7             | Biolegend                      |
|                   | TIGIT                         | PerCP/Cy5.5         | A15153G          | Biolegend                      |
|                   | CD4                           | AF 700              | OKT4             | Biolegend                      |
|                   | CD8                           | Pacific Blue        | HIT8a            | Biolegend                      |
|                   | CD3                           | Cy7/PE              | UCHT1            | Biolegend                      |
|                   | CD56                          | BUV395              | NCAM16.2         | BD                             |
|                   | CD45                          | APC-H7              | 2D1              | BD                             |
|                   | PI                            | PerCP               | N/A              | N/A                            |
|                   | CD19                          | QDOT605             | HIB19            | Biolegend                      |
| T and B cells FMT | CD45RA                        | BV510               | HI100            | BD                             |
|                   | CD62L                         | FITC                | DREG-56          | Biolegend                      |
|                   | IgG4/anti-IgG4                | PE                  | HP6025           | Southern Biotech               |
|                   | IgG1k                         | APC                 | P3.6.2.8.1       | eBioscience                    |
|                   | IgG2                          | PerCP/Cy5.5         | MOPC-173         | Biolegend                      |
|                   | CD4                           | AF 700              | OKT4             | Biolegend                      |
|                   | CD8                           | Pacific Blue        | HIT8a            | Biolegend                      |
|                   | CD3                           | Cy7/PE              | UCHT1            | Biolegend                      |
|                   | CD56                          | BUV395              | NCAM16.2         | BD                             |
|                   | CD45                          | APC-H7              | 2D1              | BD                             |
|                   | PI                            | PerCP               | N/A              | N/A                            |
|                   | CD19                          | QDOT605             | HIB19            | Biolegend                      |
| Treg and NK cells | CD45RA                        | BV510               | HI100            | BD                             |
|                   | CD56                          | FITC                | NCAM16.2         | BD                             |
|                   | CD70                          | PE                  | 113-16           | Biolegend                      |
|                   | CD127                         | APC                 | eBioRDR5         | eBioscience                    |
|                   | CD16                          | PerCP/Cy5.5         | 3G8              | BD                             |
|                   | CD4                           | AF 700              | OKT4             | Biolegend                      |
|                   | CD8                           | Pacific Blue        | HIT8a            | Biolegend                      |
|                   | CD25                          | Cy7/PE              | BC96             | Biolegend                      |
|                   | CD27                          | BUV737              | L128             | BD                             |
|                   | CD45                          | APC-H7              | 2D1              | BD                             |
|                   | PI                            | PerCP               | N/A              | N/A                            |
|                   | CD3                           | BV510               | UCHT1            | BD                             |
| NK cells 1        | DNAM1                         | FITC                | 11A8             | Biolegend                      |
|                   | NKp44                         | PE                  | P44-8            | Biolegend                      |
|                   | NKp80                         | APC                 | 5D12             | Biolegend                      |
|                   | KIR2DL1/S1/S3/S5              | PerCP/Cy5.5         | HP-MA4           | Biolegend                      |

|                   |            |              |            |                           |
|-------------------|------------|--------------|------------|---------------------------|
|                   | NKG2C      | AF 700       | 134522     | R&D                       |
|                   | CD57       | Pacific Blue | HCD57      | Biolegend                 |
|                   | KLRG1      | Cy7/PE       | 14C2A07    | Biolegend                 |
|                   | CD56       | BUV395       | NCAM16.2   | BD                        |
|                   | CD45       | APC-H7       | 2D1        | BD                        |
|                   | PI         | PerCP        | N/A        | N/A                       |
|                   | LAG-3      | QDOT605      | T47-530    | BD                        |
|                   | CD3        | BV510        | UCHT1      | BD                        |
| NK cells 2        | NKp46      | FITC         | 9E2        | Biolegend                 |
|                   | NKG2A      | PE           | REA110     | Miltenyi Biotec           |
|                   | NKG2D      | APC          | 1D11       | Biolegend                 |
|                   | KIR2DL2/L3 | PerCP/Cy5.5  | DX27       | Biolegend                 |
|                   | LILRB1     | AF 700       | 292305     | R&D                       |
|                   | KIR3DL1    | Pacific Blue | DX9        | Biolegend                 |
|                   | NKp30      | Cy7/PE       | AF29-4D12  | Invitrogen                |
|                   | CD56       | BUV395       | NCAM16.2   | BD                        |
|                   | CD45       | APC-H7       | 2D1        | BD                        |
|                   | PI         | PerCP        | N/A        | N/A                       |
|                   | CD3        | BV510        | UCHT1      | BD                        |
| Intracellular     | CD56       | FITC         | NCAM16.2   | BD                        |
|                   | CD62L      | PE           | DREG-56    | Biolegend                 |
|                   | FoxP3      | APC          | 236A/E7    | Invitrogen                |
|                   | CD4        | PerCP/Cy5.5  | OKT4       | Biolegend                 |
|                   | Ghost Dye  | AF 700       | N/A        | Tonbo                     |
|                   | CD8        | Pacific Blue | HIT8a      | Biolegend                 |
|                   | CTLA-4     | Cy7/PE       | L3D10      | Biolegend                 |
|                   | Ki67       | BUV395       | B56        | BD                        |
|                   | CD3        | BUV737       | UCHT1      | BD                        |
|                   | CD45       | APC-H7       | 2D1        | BD                        |
|                   | CD45RA     | BV510        | HI100      | BD                        |
| Intracellular FMT | CD56       | FITC         | NCAM16.2   | BD                        |
|                   | CD62L      | PE           | DREG-56    | Biolegend                 |
|                   | Perforin   | APC          | dG9        | Biolegend                 |
|                   | CD4        | PerCP/Cy5.5  | OKT4       | Biolegend                 |
|                   | Ghost Dye  | AF 700       | N/A        | Tonbo                     |
|                   | CD8        | Pacific Blue | HIT8a      | Biolegend                 |
|                   | IgG1k      | Cy7/PE       | P3.6.2.8.1 | eBioscience               |
|                   | IgG1       | BUV395       | X40        | BD                        |
|                   | CD3        | BUV737       | UCHT1      | BD                        |
|                   | CD45       | APC-H7       | 2D1        | BD                        |
|                   | CD45RA     | BV510        | HI100      | BD                        |
| BLIMP-1           | CD62L      | FITC         | DREG-56    | Biolegend                 |
|                   | BLIMP-1    | PE           | C14A4      | Cell Signaling Technology |
|                   | FoxP3      | APC          | 236A/E7    | Invitrogen                |
|                   | CD4        | AF 700       | OKT4       | Biolegend                 |
|                   | CD8        | Pacific Blue | HIT8a      | Biolegend                 |
|                   | CD3        | Cy7/PE       | UCHT1      | Biolegend                 |
|                   | CD56       | BUV395       | NCAM16.2   | BD                        |
|                   | CD45       | APC-H7       | 2D1        | BD                        |
|                   | CD19       | QDOT605      | HIB19      | Biolegend                 |
|                   | CD45RA     | BV510        | HI100      | BD                        |
| BLIMP-1 FMO       | CD62L      | FITC         | DREG-56    | Biolegend                 |
|                   | IgG        | PE           | DA1E       | Cell Signaling Technology |
|                   | FoxP3      | APC          | 236A/E7    | Invitrogen                |

|        |              |          |           |
|--------|--------------|----------|-----------|
| CD4    | AF 700       | OKT4     | Biolegend |
| CD8    | Pacific Blue | HIT8a    | Biolegend |
| CD3    | Cy7/PE       | UCHT1    | Biolegend |
| CD56   | BUV395       | NCAM16.2 | BD        |
| CD45   | APC-H7       | 2D1      | BD        |
| CD19   | QDOT605      | HIB19    | Biolegend |
| CD45RA | BV510        | HI100    | BD        |

AF 700—Alexa Fluor 700, BD—Becton Dickinson Company, FCCC—Fox Chase Cancer Center, PI—propidium iodide.
